# Supplementary material
Source: publisher site journal article supplement (https://www.dovepress.com/article/159163)
Supplement: Supplementary file 1 [file get_supplementary_file.php]

## Supplementary material

| <b>Appendix</b>                      |              |                                                        |                                                                            |                                                                                                                         |                                                                                                                      |
|--------------------------------------|--------------|--------------------------------------------------------|----------------------------------------------------------------------------|-------------------------------------------------------------------------------------------------------------------------|----------------------------------------------------------------------------------------------------------------------|
| Author                               | Study design | Participants                                           | Aim                                                                        | Main findings                                                                                                           | Comment/Conclusion                                                                                                   |
| Cheung et al <sup>46</sup> , 2016    | Case-series  | 7 PsO                                                  | Link PsO and comorbidities using miRNA                                     | Cholesterol efflux miRNA upregulated in lesional skin                                                                   | MiRNA may serve as a mechanistic link between psoriatic skin inflammation and systemic PsO comorbidities             |
| Henseler et al <sup>40</sup> , 1995  | Case-control | 2,941 PsO<br>355 ODD                                   | Comorbidities in PsO                                                       | More systemic conditions, including T2D (observed and expected frequency, O/E = 1.47)                                   | Fewer other dermatological conditions in patients with PsO                                                           |
| Sommer et al <sup>25</sup> , 2006    | Case-control | 581 PsO<br>1,044 C                                     | Elucidate association of PsO with chronic vascular and metabolic disorders | T2D OR in PsO:<br>2.24 for early onset, 2.63 for late onset<br>MS unadjusted OR = 5.29                                  | PsO is potentially life-threatening due to insulin resistance syndrome cluster of disorders                          |
| Ucak et al <sup>19</sup> , 2006      | Case-control | 70 PsO<br>40 C                                         | Glucose tolerance in PsO vs. C                                             | Impaired glucose tolerance significantly more in PsO, mainly late onset                                                 |                                                                                                                      |
| Naldi et al <sup>28</sup> , 2008     | Case-control | 560 PsO<br>690 C                                       | PsO risk based on medical conditions and drugs used prior to diagnosis     | T2D OR=1.1.                                                                                                             |                                                                                                                      |
| Solomon et al <sup>33</sup> , 2010   | Case-control | 48,718 RA<br>40,346 PsA/PsO<br>442,033 C               | Risk of DM in RA and PsA/PsO compared to non-rheumatic C                   | Adjusted HR for T2D:<br>1.5 for RA<br>1.4 for PsA/PsO                                                                   |                                                                                                                      |
| Husted et al <sup>36</sup> , 2011    | Case-control | 449 PsO<br>611 PsA                                     | Prevalence of CV risk factors in PsO with and without PsA                  | T2D prevalence PsA vs. PsO: 12.0% vs. 6.7%<br>T2D OR PsA vs. PsO was 1.90, p=0.0045<br>No difference in adjusted T2D OR | More prevalent HT in PsA suggest role of inflammatory arthritis in cardiovascular risk                               |
| Mehta et al <sup>38</sup> , 2011     | Case-control | 3,603 PsO<br>14,330 C                                  | Cardiovascular event and risk factors in PsO vs. C                         | T2D PsO vs. C: 7.5 vs 5. 1%, p<0.01                                                                                     | PsO significant history of stroke, MI, HL, HT, smoking, and elevated BMI                                             |
| Karoli et al <sup>30</sup> , 2013    | Case-control | 96 PsO<br>100 C                                        | Cardiovascular risk factors between PsO and C                              | T2D PsO vs. C: 9 vs. 2%, p=0.02<br>PsO more prevalent: HT, MS, HL<br>Longer disease duration in PsO+MS                  | Otherwise healthy PsO should be encouraged to reduce modifiable risk factors                                         |
| Bang et al <sup>24</sup> , 2014      | Case-control | 154 PsO<br>6,945 C                                     | Risk of atrial fibrillation                                                | T2D baseline PsO v. C; 18.1 vs. 12.3%, p=0.015                                                                          | PsO predict new-onset atrial fibrillation. Studies should delineate association and determine the need for screening |
| Bostoen et al <sup>39</sup> , 2014   | Case-control | 49 PsO<br>55 PsA                                       | Metabolic disease burden in PsA and PsO                                    | MS in PsO vs. PsA: 44.9 vs. 25.5%, p=0.037<br>AO in PsO vs. PsA: 83.7 vs. 65.5%, p=0.034                                | Recommend patient education about lifestyle                                                                          |
| Dubreuil et al <sup>32</sup> , 2014  | Case-control | 59,281 PsO<br>4,196 PsA                                | Diabetes incidence in cohorts                                              | Diabetes incidence PsA vs. PsO:<br>7.3 vs. 6.4 pr.1000 person-years                                                     |                                                                                                                      |
| Gerdes et al <sup>51</sup> , 2014    | Case-control | 20 lean PsO<br>20 obese PsO<br>20 lean C<br>20 obese C | Wnt5a contribution to metabolic complications                              | Wnt5a significantly higher PsO groups.<br>Wnt5a significantly higher in obese PsO compared to lean PsO                  | Wnt5a suggested to play a role in PsO comorbidity. Data support influence of diet and/or obesity on comorbidity      |
| Labitigan et al <sup>53</sup> , 2014 | Case-control | 4,105 PsA<br>25,976 RA                                 | Comorbidity prevalence PsA vs. RA                                          | T2D in PsA vs. RA: 15 vs. 11%, p=0.02                                                                                   |                                                                                                                      |

|                                                  |                        |                                                                        |                                                                         |                                                                                                                                                                  |                                                                                                                                                    |
|--------------------------------------------------|------------------------|------------------------------------------------------------------------|-------------------------------------------------------------------------|------------------------------------------------------------------------------------------------------------------------------------------------------------------|----------------------------------------------------------------------------------------------------------------------------------------------------|
| Lee et al <sup>26</sup> , 2014                   | Case-control           | 6,611 PsO<br>6,806 C                                                   | Medication and comorbidity severity in PsO, impact on T2D risk.         | HR T2D Severe PsO vs. mild PsO: 2.06 vs. 1.28.<br>PsO significantly more: HT, HL and Cushings                                                                    | PsO risk of T2D is modulated by PsO severity, comorbidities and concomitant medication                                                             |
| Edson-Heredia et al <sup>34</sup> , 2015         | Case-control           | 27,672 mild PsO<br>22,174 moderate PsO<br>5,498 severe PsO<br>1952 PSA | Comorbidity risk in PsO vs. PsA                                         | PsO T2D prevalence 5%, incidence rate 0.57 per 100 person-years. Severe PsO and RA T2D HR compared to mild PsO: 1.23 and 2.88 PSA more HT compared to severe PsO | PsA with larger comorbid burden compared to overall PsO, but inconsistent for severe PsO. Mild PsO less affected than severe PsO                   |
| Feldman et al <sup>52</sup> , 2015               | Case-control           | 1,230 PsO+PsA<br>1,230 C                                               | Comorbidities and health care utilization in PsO+PsA vs. C              | PsO+PsA significantly more HT (35.8 vs. 23.5%), HL (34.6 vs. 28.5%), T2D (15.8 vs. 10.0%) – all p<0.01                                                           | Substantial economic and comorbidity burden among moderate-severe PsO+PsA despite availability of biologic treatments                              |
| Nas et al <sup>35</sup> , 2015                   | Case-control           | 67 PsO<br>173 PsA<br>138 RA                                            | Comorbidities in PsO vs. PsA vs. RA                                     | HT OR PsA vs. PsO: 4.26<br>BMI higher in PsA vs. PsO, p=0.007<br>No difference in comorbidity prevalence                                                         |                                                                                                                                                    |
| Parisi et al <sup>23</sup> , 2015                | Case-control           | 48,523 PsO<br>208,187 C                                                | Comorbidity risk, hazard ratio                                          | PsO significantly more HT (15.39 vs. 14.93%, p=0.011), higher mean BMI (p<0.001)                                                                                 | Inflammatory arthritis in PsO is an independent risk factor for major CV events                                                                    |
| Puig et al <sup>54</sup> , 2015                  | Case-control           | 189 PsO<br>84 PsA                                                      | PsO compared to PsA during 24 weeks of etanercept treatment             | No difference in PASI. Prevalence of HT (61.9 vs. 26.5%) and T2D (21.4 vs. 9.0%) significantly higher in PsA                                                     | Screening for PsA and cardiovascular risk factors is important. Early detection may help guide treatment decisions and reduce overall disease risk |
| Jacob et al <sup>22</sup> , 2016                 | Case-control           | 72,148 T2D<br>72,148 C                                                 | Risk of PsO diagnosis in T2D                                            | T2D increased risk of PsO over 10 year-period (HR= 1.12 (1.08-1.29))                                                                                             | T2D positively associated with PsO. Study design limits reliability. No conclusions regarding causal relationship between T2D and PsO              |
| Lee et al <sup>21</sup> , 2016                   | Case-control           | 135 PsO<br>73 C                                                        | Relationship between childhood PsO and metabolic syndrome, and obesity. | No difference in mean WtHR between groups. Elevated WtHR more prevalent in PsO. BMI based overweight not different between groups                                | Increased cardiometabolic risk warrants discussion of lifestyle choices in PsO patients                                                            |
| Buquicchio et al <sup>47</sup> , 2017 (abstract) | Case-control           | 15 PsO<br>(unknown) C                                                  | Serum levels of clusterin                                               | PsO significantly higher levels (p<0.001)                                                                                                                        | Clusterin suggested as pathogenic marker in PsO.                                                                                                   |
| Kwa et al <sup>17</sup> , 2017                   | Case-control           | 185,803 PsO compared to BPP                                            | Comorbidity OR in inflammatory skin diseases                            | PsO vs. C: HT (OR:1.61), T2D (OR:1.22), obesity (OR: 2.36)                                                                                                       | PsO associated with increased CV risk, particularly at younger age                                                                                 |
| Radtke et al <sup>43</sup> , 2017                | Case-control           | 37,456 PsO<br>48,140 AD                                                | Comorbidity prevalence in PsO vs. AD                                    | T2D, HT, HL and obesity significantly more common in PsO                                                                                                         |                                                                                                                                                    |
| Wan et al <sup>37</sup> , 2018                   | Case-control           | 8,124 PsO<br>76,599 C                                                  | T2D risk in PsO vs. C                                                   | HR for T2D (PsO vs. C): increases with BSA (trend p=0.004)                                                                                                       | BSA >10% should be targeted for diabetes prevention efforts                                                                                        |
| Mahé et al <sup>29</sup> , 2013                  | Cross-sectional Cohort | 545 COP<br>1656 AOP                                                    | CV and metabolic comorbidities                                          | T2D AOP vs. COP: 12.9 vs. 4.6%, p<0.0001<br>AOP significantly more HT, HL and mean BMI                                                                           |                                                                                                                                                    |
| Baeta et al <sup>5</sup> , 2014                  | Cross-sectional cohort | 190 PsO                                                                | Comorbidities in PsO                                                    | T2D in PsO: 15.3%                                                                                                                                                | PsO may manifest as a multisystem disease.                                                                                                         |
| Mahé et al <sup>50</sup> , 2014                  | Cross-sectional cohort | 191 PsO                                                                | Risk of factors for weight increment in PsO treated with infliximab     | T2D prevalence independent of weight was 10.5%                                                                                                                   | Weight monitoring in PsO on infliximab due to increased prevalence of comorbidities and risk of weight increment                                   |

|                                            |                                |                                                            |                                                                                  |                                                                                                                                          |                                                                                                                                                                                    |
|--------------------------------------------|--------------------------------|------------------------------------------------------------|----------------------------------------------------------------------------------|------------------------------------------------------------------------------------------------------------------------------------------|------------------------------------------------------------------------------------------------------------------------------------------------------------------------------------|
| Sanchez-Carazo et al <sup>9</sup> , 2014   | Cross-sectional cohort         | 1,022 PsO                                                  | Correlation between quality of life and comorbidities in PsO                     | Diabetes in 8%, >90% was T2D.                                                                                                            |                                                                                                                                                                                    |
| Armstrong et al <sup>20</sup> , 2015       | Cross-sectional cohort         | 6,164 D<br>6,164 D+PsO                                     | Risk of vascular complications D vs. D+PsO                                       | D+PsO increased risk of microvascular events overall and by PsO severity                                                                 |                                                                                                                                                                                    |
| Phan et al <sup>8</sup> , 2016             | Cross-sectional cohort         | 212 PsO (≥70 years of age)<br>1,998 PsO (<70 years of age) | Comorbidities in PsO                                                             | PsO >70 years significantly higher prevalence of comorbidities, except obesity                                                           |                                                                                                                                                                                    |
| Pongpit et al <sup>11</sup> , 2016         | Cross-sectional cohort         | 165 PsO                                                    | Comorbidities in PsO                                                             | T2D: 50.3%<br>MS: 18.8%                                                                                                                  |                                                                                                                                                                                    |
| Rutter et al <sup>55</sup> , 2016          | Cross-sectional cohort         | 287 PsO                                                    | Investigate if risk factor screening augments their prevalence                   | Difference between known and screen-detected risk factors                                                                                | Screening identified high proportion of patients with high CVD risk and suboptimal management of known risk factors                                                                |
| Theodorakopoulou <sup>42</sup> et al, 2016 | Cross-sectional cohort         | 17 PsO EOP<br>14 PsO LOP<br>340 PsO from different cohort  | Phenotypical comparison between groups                                           | EOP: Greater lymphocytic infiltration (p=0.03), LOP: greater CD4+:CD8+ ratio (p=0.002). In different cohort, LOP more likely to have T2D | Findings support differences between EOP and LOP                                                                                                                                   |
| Dregan et al <sup>12</sup> , 2017          | Cross-sectional cohort         | 6,286 PsO                                                  | Morbidity and mortality in PsO                                                   | T2D: 6%<br>CHD: 6%<br>T2D+CHD: 1%                                                                                                        |                                                                                                                                                                                    |
| Kojanova et al <sup>13</sup> , 2017        | Cross-sectional cohort         | 1,412 PsO                                                  | Characteristics and risk profile in PsO treated with biologics                   | T2D: 11.4%, PsA: 41.0%, HT: 35.2%, HL: 27.7%, Obese: 15.2%, CHD: 4.9%                                                                    | Found prevalence's were either similar or higher compared to other European registries                                                                                             |
| Xu et al <sup>14</sup> , 2017              | Cross-sectional cohort         | 27 PsO COP<br>229 PsO EOP<br>183 PsO LOP                   | Comorbidities in PsO                                                             | Fatty liver, HL and MS most prevalent in EOP, whereas T2D most in LOP                                                                    | EOP have MS mainly related to lipid disorders. Glucose metabolism and diabetes, often not involved                                                                                 |
| Ardisen et al <sup>15</sup> , 2018         | Cross-sectional cohort         | 563 PsO                                                    | Prevalence of CV risk factors                                                    | MS: 12.6%, Central obesity: 38.7%, HT: 14.3%, DL: 18.6%, T2D: 9.2%                                                                       | MS+PsO had longer disease duration and were women. Central obesity and T2D associated to severe disease                                                                            |
| Mihai et al <sup>16</sup> , 2018           | Cross-sectional cohort         | 82 PsO                                                     | Association of selected single-nucleotide polymorphisms (SNPs) to PsO            | PsO severity not significantly influenced by any of the studied SNPs. Two SNPs associated with T2D                                       | The influence of SNP's on multiple organ systems justifies research on its relation to MS development in PsO                                                                       |
| Gisoni et al <sup>6</sup> , 2013           | Prospective cohort             | 10,539 PsO                                                 | Laboratory measures and new diagnoses: 16 weeks of systemic treatment, 8 groups. | Average prevalence of T2D in treatment groups was 7.1%<br>During treatment average new diagnosis of T2D was 0.18%                        | Benefits and risks of systemic therapy must be weighed carefully for each patient to ensure optimal management of PsO symptoms and minimization of acute and cumulative toxicities |
| Kimbal et al <sup>18</sup> , 2014          | Prospective cohort             | 11,900 PsO                                                 | Demographic and disease characteristics                                          | T2D: 11.4%.<br>Mean BMI of 30.9kg/m2                                                                                                     | Cardiovascular risk factors, incl. T2D, increased substantially with age. Patient age should be considered when evaluating PsO comorbidities                                       |
| Phan et al <sup>7</sup> , 2014 (abstract)  | Multicenter prospective cohort | 2,210 PsO                                                  | Metabolic comorbidities in PsO compared to background population                 | Obese: 24.5%, HT: 26.0%, DL: 27.5%, T2D: 11.0%<br>T2D incidence higher in PsO than BPP, particularly after age of 35 years               | PsO associated with significant metabolic comorbidities and hypertension compared to general population                                                                            |
| Vanaclocha et al <sup>10</sup> , 2014      | Multicenter prospective cohort | 528 PsO                                                    | Comorbidities and risk factors in PsO                                            | Smoking: 40.5%, obesity: 26.0%, DL: 24.8%, HT: 24.3%, T2D: 12.3%                                                                         | Almost ¾ PsO had ≥1 CV risk factor<br>Dermatologist to take active role. Patients are often young and with little knowledge of CV risk                                             |

P; Patients, C; Controls, BPP; Background Population PsO; Psoriasis, AO; Abdominal obesity, CHD; Coronary heart Disease, MI; Myocardial Infarction, PsA; Psoriatic Arthritis, OR; Odds Ratio, HR; Hazard Ratio, T2D; Type-2-diabetes mellitus, HT; Hypertension, HL; Hyperlipidemia, DL; Dyslipidemia, MS; Metabolic Syndrome, BSA; Body Surface Area, BMI; Body Mass Index, WtHR; Waist to Height Ratio, ODD; Other dermatological diseases, PASI; Psoriasis Activity and Severity Index, IQR; Inter Quartile Range, PGA; Physicians Global Assessment, EOP; Early onset PsO (18-39 years), LOP; late onset PsO (>40 years), COP; childhood onset PsO (<18 years).

## References

1. Mahé E, Reguiat Z, Barthelemy H, et al. Evaluation of risk factors for body weight increment in psoriatic patients on infliximab: a multicentre, cross-sectional study. *J Eur Acad Dermatol Venereol*. 2014;28(2):151–159.
2. Gerdes S, Laudes M, Neumann K, Baurecht H, Mrowietz U. Letter to the editor Wnt5a – a potential factor linking psoriasis to metabolic complications. *Exp Dermatol*. 2014:438–441.
3. Feldman SR, Zhao Y, Shi L, Tran MH, Lu J. Economic and comorbidity burden among moderate-to-severe psoriasis patients with comorbid psoriatic arthritis. *Arthritis Care Res*. 2015;67(5):708–717.
4. Monalyn Labitigan M, Bahce-Altuntas A, Kremer JM, et al. Higher rates and clustering of abnormal lipids, obesity, and diabetes in psoriatic arthritis compared with rheumatoid arthritis. *Arthritis Care Res*. 2014;66(4):600–607.
5. Puig L, Strohal R, Husni ME, et al. Cardiometabolic profile, clinical features, quality of life and treatment outcomes in patients with moderate-to-severe psoriasis and psoriatic arthritis. *J Dermatolog Treat*. 2015;26(1):7–15.
6. Rutter MK, Kane K, Lunt M, et al. Primary care-based screening for cardiovascular risk factors in patients with psoriasis. *Br J Dermatol*. 2016;175(2):348–356.
